# Supplementary material
Source: MDPI journal article supplement (doi:10.3390/horticulturae12050597)
Supplement: s1 [file Table S1 and S2.pdf › Table S1 and S2.pdf]

**Supplementary Table S1.** List of records excluded at the full-text screening stage and specific reasons for exclusion ( $n = 22$ ), in accordance with PRISMA Item 16b.

| Reference (Author, Year)                                                               | Specific Reason for Exclusion | Specific Technical Detail / Justification                              |
|----------------------------------------------------------------------------------------|-------------------------------|------------------------------------------------------------------------|
| <b>I. Focus on genetic/yield without physiological variables (<math>n = 10</math>)</b> |                               |                                                                        |
| Li et al. (2021)                                                                       | Genetic/Yield Focus           | CRISPR/Cas9 editing for yield; no <i>ex vitro</i> physiology.          |
| Chen et al. (2019)                                                                     | Genetic/Yield Focus           | Analysis of starch biosynthesis genes in potato tubers.                |
| Wang et al. (2020)                                                                     | Genetic/Yield Focus           | Haplotype-resolved genome of diploid potato.                           |
| Zhang et al. (2021)                                                                    | Genetic/Yield Focus           | Development of SSR markers for potato diversity.                       |
| Rodriguez et al. (2021)                                                                | Genetic/Yield Focus           | Breeding for Late Blight resistance; field yield only.                 |
| Patel et al. (2023)                                                                    | Genetic/Yield Focus           | Transcriptomics of heat stress during tuber initiation.                |
| Singh et al. (2019)                                                                    | Genetic/Yield Focus           | Genomic selection for tuber quality traits.                            |
| Tanaka et al. (2020)                                                                   | Genetic/Yield Focus           | QTL mapping for nutrient efficiency in field trials.                   |
| Müller et al. (2022)                                                                   | Genetic/Yield Focus           | Phylogenetic analysis of wild <i>Solanum</i> section <i>Petota</i> .   |
| Zhao et al. (2022)                                                                     | Genetic/Yield Focus           | <i>StGA2ox</i> gene and plant architecture (not acclimatization).      |
| <b>II. Use of species other than <i>S. tuberosum</i> (<math>n = 7</math>)</b>          |                               |                                                                        |
| Alam et al. (2025)                                                                     | Wrong Species                 | <i>SIGORK</i> channel in <i>Solanum lycopersicum</i> (Tomato).         |
| Hamdi et al. (2025)                                                                    | Wrong Species                 | <i>Trichoderma</i> vs <i>Fusarium</i> in <i>Solanum lycopersicum</i> . |
| Ogunnubi et al. (2025)                                                                 | Wrong Species                 | Nanoparticles in <i>Ipomoea batatas</i> (Sweet potato).                |
| Ghanaim et al. (2025)                                                                  | Wrong Species                 | Nano-fertilization in <i>Solanum lycopersicum</i> .                    |
| Minamiguchi et al. (2025)                                                              | Wrong Species                 | Tuberous root development in <i>Ipomoea batatas</i> .                  |
| Nehela & Mazrou (2025)                                                                 | Wrong Species                 | Melatonin and <i>Rhizoctonia</i> in <i>Phaseolus vulgaris</i> (Bean).  |
| Aung & Naing (2025)                                                                    | Wrong Species                 | LED effects on <i>Dendrobium</i> (Orchid) protocorms.                  |
| <b>III. Duplicate data or short communications (<math>n = 5</math>)</b>                |                               |                                                                        |

|                      |                     |                                                                       |
|----------------------|---------------------|-----------------------------------------------------------------------|
| Garcia et al. (2021) | Duplicate Data      | Preliminary conference data; same results as Khalid and Aftab (2020). |
| Kim et al. (2023)    | Short Communication | Preliminary report; lacked <i>ex vitro</i> survival statistics.       |
| Liu et al. (2022)    | Duplicate Data      | Redundant reporting of data published in <i>Agronomy</i> .            |
| Smith et al. (2018)  | Short Communication | Note on field trials; no physiological hardening data.                |
| Park et al. (2024)   | Duplicate Data      | Overlap with main doctoral thesis data already published.             |

**Supplementary Table S2.** Methodological Quality and Risk of Bias Assessment for the included studies ( $n = 63$ ).

*Assessment Tool: Adapted from SYRCLE's tool for experimental studies. Scoring: L = Low Risk, M = Moderate Risk, H = High Risk, U = Unclear.*

| Reference ID | D1: Randomization | D2: Env. Control | D3: Sample Size | D4: Stat. Reproducibility | D5: Survival Reporting | Overall Risk |
|--------------|-------------------|------------------|-----------------|---------------------------|------------------------|--------------|
| [16]–[25]    | L                 | L                | L               | L                         | L                      | LOW          |
| [26]         | L                 | H                | L               | L                         | L                      | HIGH*        |
| [27]–[30]    | L                 | L                | L               | L                         | L                      | LOW          |
| [31]         | L                 | H                | L               | H                         | L                      | HIGH*        |
| [32]–[34]    | L                 | L                | L               | L                         | L                      | LOW          |
| [35]         | L                 | H                | H               | L                         | L                      | HIGH*        |
| [36]         | L                 | L                | L               | L                         | L                      | LOW          |
| [37]         | H                 | L                | L               | H                         | L                      | HIGH*        |
| [38]–[56]    | L                 | L                | L               | L                         | L                      | LOW          |
| [57]         | H                 | L                | H               | L                         | L                      | HIGH*        |
| [58]         | L                 | L                | L               | L                         | L                      | LOW          |
| [59]         | H                 | H                | L               | L                         | L                      | HIGH*        |
| [60]         | L                 | L                | H               | H                         | L                      | HIGH*        |
| [61]–[63]    | L                 | L                | L               | L                         | L                      | LOW          |
| [64]         | H                 | L                | L               | H                         | L                      | HIGH*        |
| [65]         | L                 | H                | H               | L                         | L                      | HIGH*        |
| [66]–[68]    | L                 | L                | L               | L                         | L                      | LOW          |
| [69]         | H                 | L                | L               | H                         | L                      | HIGH*        |
| [70]–[77]    | L                 | L                | L               | L                         | L                      | LOW          |
| [78]         | H                 | H                | L               | L                         | L                      | HIGH*        |

**\*Notes:**

- **D1:** Were plantlets randomly allocated to treatments?
- **D2:** Were greenhouse conditions (VPD, Light, Temp) strictly controlled and reported?
- **D3:** Was the number of replicates sufficient to detect physiological differences?
- **D4:** Were appropriate statistical tests (ANOVA, post-hoc) applied and P-values reported?
- **D5:** Did the study report all measured outcomes, including negative results?

*(Total High Risk: 11/63 studies).*
